# Supplementary material
Source: publisher figshare collection journal article supplement (https://acs.figshare.com/ndownloader/files/28737252)
Supplement: Supplementary file 1 [file 28737252]

## Supporting Information

# Photocatalytic oxidation of SO<sub>2</sub> by TiO<sub>2</sub>: Aerosol formation and key role of gaseous reactive oxygen species

*Yi Chen,<sup>a,b</sup> Shengrui Tong,<sup>a,\*</sup> Weiran Li,<sup>a,b</sup> Yanping Liu,<sup>a,b</sup> Fang Tan,<sup>a</sup> Maofa Ge,<sup>a,b,c,\*</sup> Xiaofeng Xie,<sup>d</sup> and Jing Sun<sup>d</sup>*

<sup>a</sup> State Key Laboratory for Structural Chemistry of Unstable and Stable Species, Beijing National Laboratory for Molecular Sciences (BNLMS), CAS Research/Education Center for Excellence in Molecular Sciences, Institute of Chemistry, Chinese Academy of Sciences, Beijing, 100190, P. R. China

<sup>b</sup> University of Chinese Academy of Sciences, Beijing 100049, P. R. China

<sup>c</sup> Center for Excellence in Regional Atmospheric Environment, Institute of Urban Environment, Chinese Academy of Sciences, Xiamen 361021, China

<sup>d</sup> Shanghai Institute of Ceramics, Chinese Academy of Sciences, Shanghai 200050, China

Number of Pages: 15

Number of Table: 1

Number of Figures: 10

|                                                                                                                                                                                                                                                                                                                            |     |
|----------------------------------------------------------------------------------------------------------------------------------------------------------------------------------------------------------------------------------------------------------------------------------------------------------------------------|-----|
| Experimental methods .....                                                                                                                                                                                                                                                                                                 | S3  |
| Results of smog chamber experiments .....                                                                                                                                                                                                                                                                                  | S6  |
| Table S1. Experimental setups and results of SO <sub>2</sub> photocatalyzed by TiO <sub>2</sub> at various RH conditions .....                                                                                                                                                                                             | S6  |
| Scheme S1. The reaction between HPF and OH radical .....                                                                                                                                                                                                                                                                   | S8  |
| Scheme S2. the reaction between ABTS and H <sub>2</sub> O <sub>2</sub> in the presence of POD .....                                                                                                                                                                                                                        | S8  |
| Figure S1. Secondary aerosol formation in the photolysis of SO <sub>2</sub> at RH 1% (a) and 30% (b) .....                                                                                                                                                                                                                 | S9  |
| Figure S2. Reaction rate of the photocatalysis of SO <sub>2</sub> by TiO <sub>2</sub> at various RH condition. ....                                                                                                                                                                                                        | S9  |
| Figure S3. Evolution of SA <sub>g</sub> including total mass, total surface, total volume, and total number concentration (a), the distribution comparison of number concentration (b), surface concentration (c), and Volume concentration (d) before NH <sub>3</sub> injection and after NH <sub>3</sub> injection. .... | S10 |
| Figure S4. Formation of SA <sub>g</sub> in the photocatalysis of SO <sub>2</sub> by TiO <sub>2</sub> at different RH .....                                                                                                                                                                                                 | S11 |
| Figure S5. Formation of SA <sub>g</sub> -H <sub>2</sub> SO <sub>4</sub> in the photocatalysis of SO <sub>2</sub> by TiO <sub>2</sub> at different RH .....                                                                                                                                                                 | S12 |
| Figure S6. The absorption of H <sub>2</sub> O on TiO <sub>2</sub> under dark condition .....                                                                                                                                                                                                                               | S13 |
| Figure S7. DRIFTS spectra of the photocatalysis of H <sub>2</sub> O by TiO <sub>2</sub> under different RH condition. ....                                                                                                                                                                                                 | S13 |
| Figure S8. DRIFTS spectra of the adsorbed H <sub>2</sub> O <sub>2</sub> (30% in H <sub>2</sub> O) on TiO <sub>2</sub> . ....                                                                                                                                                                                               | S14 |
| Figure S9. Evolution of the integral areas of SO <sub>4</sub> <sup>2-</sup> on TiO <sub>2</sub> at various RH conditions. ....                                                                                                                                                                                             | S14 |
| Figure S10. Gaussian fitting of the proportion of SO <sub>2</sub> oxidized in gas phase with the increase of RH .....                                                                                                                                                                                                      | S15 |

## EXPERIMENTAL METHODS

### Pre-treatment of TiO<sub>2</sub>

First, TiO<sub>2</sub> was calcined at 673K in a muffle furnace. Then, 100 ± 1 mg TiO<sub>2</sub> was dispersed in 5 mL deionized water with 15 min ultrasound treatment. After that, the suspension of TiO<sub>2</sub> was coated on glass plate and dried with gentle zero air. When the film of TiO<sub>2</sub> was formed, the coated glass plate was dried at 473 K for 2 h in an oven. Then put the cooled glass plate into reactor and fixed it. The reactor was washed with zero air for several times after that. At last, lights in smog chamber were turned on for 11 h to further purify the coated TiO<sub>2</sub>.

### Aerosol yields calculation

With the input of aerosol density ( $\rho$ , g/cm<sup>3</sup>) as illustrated in table S1, number concentration, mass concentration, diameter distribution of aerosol could be direct obtained from the output of SMPS data. The SA<sub>g</sub>-H<sub>2</sub>SO<sub>4</sub> ( $m_{\text{net}}$ , µg/m<sup>3</sup>) was calculated from the mass concentration of SA<sub>g</sub> ( $m_{\text{aerosol}}$ , µg/m<sup>3</sup>) and the ratio of H<sub>2</sub>SO<sub>4</sub> in aerosol ( $\gamma$ ) as shown in equation 1. The yields of SA<sub>g</sub> ( $Y_{\text{aerosol}}$ , %) and SA<sub>g</sub>-H<sub>2</sub>SO<sub>4</sub> ( $Y_{\text{net}}$ , %) were calculated with equation 2, where  $\Delta\text{SO}_2$  was the consumed SO<sub>2</sub> concentration (ppbv),  $M_{\text{SO}_2}$  (g/mol) was the molar mass of SO<sub>2</sub> and A was the molar gas volume. The ratio of SO<sub>2</sub> oxidized in gas phase ( $\alpha$ ) was calculated from equation 3, where  $M_{\text{H}_2\text{SO}_4}$  was the molar mass of H<sub>2</sub>SO<sub>4</sub>.

$$m_{\text{net}} = m_{\text{aerosol}} \times \gamma \quad (1)$$

$$Y_{\text{aerosol/net}} = \frac{A \times m_{\text{aerosol/net}}}{M_{\text{SO}_2} \times \Delta\text{SO}_2} \times 100\% \quad (2)$$

$$\alpha = \frac{m_{\text{net}} \times A}{M_{\text{H}_2\text{SO}_4} \Delta\text{SO}_2} \times 100\% \quad (3)$$

### Flow tube experiment with SO<sub>4</sub><sup>2-</sup> pre-treated TiO<sub>2</sub>

The flow tube experiment was also performed with sulphate pre-treated TiO<sub>2</sub>. Sulfate was pre-adsorbed on the coated TiO<sub>2</sub> via the photodegradation of SO<sub>2</sub> in the illumination of UV-light. Sulfate adsorbed on the surface of TiO<sub>2</sub> in physical and weak chemical way was swept off with

zero air in a fast flow rate. Thus, the remaining sulfate on TiO<sub>2</sub> surface was hardly removed. Then, the pre-treated TiO<sub>2</sub> would be used for all RH conditions experiments.

### Simulation of H<sub>2</sub>SO<sub>4</sub> formation

According to the results from chamber experiments, we simulated the formation of SA<sub>g</sub>-H<sub>2</sub>SO<sub>4</sub> in real atmosphere. It is assumed that the generated gaseous ROS radical and the formed active sites on a unit area were considered as B and C. It was assumed that B and C almost keep constant at a certain RH condition. The generated ROS spread into gas phase. Equation 4 showed the formation rate of H<sub>2</sub>SO<sub>4</sub> in gas phase. The reaction rate of SO<sub>2</sub> participating in heterogeneous reaction could be calculated from equation 5.

$$\frac{dH_2SO_4}{dt} = k_1 \times \frac{S \times B}{V} \times C_{SO_2} \quad (4)$$

$$\frac{dSO_4^{2-}}{dt} = \gamma \times \frac{f \times S}{4} \times C_{SO_2} = k_2 \times C \times S \times C_{SO_2} \quad (5)$$

Where  $k_1$  was a coefficient related to reaction rate coefficient of SO<sub>2</sub> with ROS, and  $S$ ,  $V$  were TiO<sub>2</sub> surface area and volume of space, respectively. SO<sub>2</sub> oxidization in gas phase should be positive with the TiO<sub>2</sub> surface area and gaseous ROS formation, but negative with the  $V$ .  $\gamma$  was the uptake coefficient of SO<sub>2</sub> on TiO<sub>2</sub> and was closely related to active sites formation (C).  $f$  was denoted as the mean thermal velocity of SO<sub>2</sub>.  $k_2$  was an apparent coefficient.

Hence, the ratio of SO<sub>2</sub> oxidized in gas phase ( $\alpha$ ) should obey the rule of equation 6.

$$\alpha = \frac{dH_2SO_4}{dt} / \left( \frac{dSO_4^{2-}}{dt} + \frac{dH_2SO_4}{dt} \right) = \frac{k_1 B}{k_1 B + k_2 V C} = \frac{1}{1 + \frac{k_2 C}{k_1 B} V} = \frac{\frac{1}{V}}{\frac{1}{V} + \frac{k_2 C}{k_1 B}} \quad (6)$$

Divide equation 4 and 5 on both sides,

$$\frac{dH_2SO_4}{dt} / \frac{dSO_4^{2-}}{dt} = \frac{k_1 B}{k_2 C V} \quad (7)$$

$\frac{k_1 B}{k_2 C V}$  represents the ratio of SO<sub>2</sub> oxidized in gas phase to SO<sub>2</sub> oxidized on the surface. In our experiment,  $V$  was 1200 L. Then,  $\frac{k_1 B}{k_2 C}$  could be calculated from the value of  $\alpha$  in Table S1. Because  $\frac{k_1 B}{k_2 C}$  was affected by RH, gaussian fitting was performed to cover the whole range of RH. The gaussian fitting result was illustrated in Figure S10, and the simulation equation was shown in

equation 8. Input the value of  $\frac{k_1B}{k_2C}$  at various RH (%) and space condition,  $\alpha$  in real environment was calculated. Finally,  $H_2SO_4$  aerosol formation could be calculated from equation 9, where  $A$  was the molar gas volume,  $\Delta SO_2$  was the consumed concentration of  $SO_2$  (ppbv),  $m_{H_2SO_4}$  was the mass concentration of generated  $H_2SO_4$  aerosol,  $M_{H_2SO_4}$  was the molar mass of  $H_2SO_4$ . Because when the concentration of generated  $H_2SO_4$  reached  $7 \times 10^6$  molecule  $cm^{-3}$  (much small than 1ppbv)<sup>26</sup>,  $H_2SO_4$  aerosol start to form. We assumed that the  $SO_2$  oxidized in gas phase almost totally transformed into  $H_2SO_4$  aerosol.

$$\frac{k_1B}{k_2C} = 0.2414 \times e^{(-(RH-13.29)/7.051)^2} + 0.134 * e^{(-(RH-78.22)/92.26)^2} \quad (8)$$

$$m_{H_2SO_4} = \alpha \times \frac{\Delta SO_2}{A} \times M_{H_2SO_4} \quad (9)$$

In real atmosphere, multiple oxidation pathways could contribute to the oxidation of  $SO_2$ . If the proportion of  $SO_2$  oxidized from the photocatalytic process could be calculated, the contribution of the photocatalytic process to  $H_2SO_4$  formation could be obtained. The photocatalysis rate of  $SO_2$  in our photocatalysis experiment was  $0.59 \pm 0.03 \text{ h}^{-1}$ . There was a positive correlation between the photocatalysis rate and the surface area concentration of  $TiO_2$  coating in smog chamber. The coated area of  $TiO_2$  on glass plate was  $25 \text{ cm} \times 28.5 \text{ cm}$  and the volume of smog chamber was  $1.2 \text{ m}^3$ . Then, the photocatalysis rate of  $SO_2$  ( $k$ ) should be equal to  $(2.8 \pm 0.1) \times 10^{-1} \text{ s}^{-1} \text{ cm}$ . The consumption rate of  $SO_2$  by the photocatalysis process could be expressed by equation 10, where  $S_c$  is the complete surface area,  $V$  is the volume of space,  $j$  was the proportion of  $TiO_2$  coating area to the complete surface area,  $S_g$  is the ground area and  $H$  is boundary height. The obtained parameters in our study could be used in model to further simulate the oxidation of  $SO_2$  and the formation of  $H_2SO_4$  aerosol in complex real atmosphere.

$$-\frac{dSO_2}{dt} = k \times \frac{S_c}{V} \times j = k \times \frac{S_c}{S_g \times H} \times j \quad (10)$$

## Results of Smog Chamber Experiments

The detail results of the photocatalysis of SO<sub>2</sub> by TiO<sub>2</sub> in smog chamber are shown in Table S1. The  $\rho$  was input as parameter into SMPS, which was obtained from previous studies<sup>1</sup>. The directly detected mass concentration of SA<sub>g</sub> included H<sub>2</sub>SO<sub>4</sub> and H<sub>2</sub>O, which was illustrated in Figure S4. The yields of SA<sub>g</sub> ranged from 10.10% to 68.28%, which were calculated from the slope fitted in Figure S4. Excluding the influence of H<sub>2</sub>O, the mass concentration of SA<sub>g-H2SO4</sub> was obtained from the product of the mass concentration of aerosol and the ratio of H<sub>2</sub>SO<sub>4</sub> in aerosol ( $\gamma$ )<sup>1</sup>. The formation of SA<sub>g-H2SO4</sub> was shown in Figure S5. The yields of SA<sub>g-H2SO4</sub> ranged from 10.10% to 32.64%. The different colors in Figure S4 and Figure S5 represent the repeated experiments.

**Table S1. Experimental setups and results of SO<sub>2</sub> photocatalyzed by TiO<sub>2</sub> at various RH conditions**

| RH (%) | $\rho$ (g/cm <sup>3</sup> ) <sup>1</sup> | Ratio of H <sub>2</sub> SO <sub>4</sub> in aerosol $\gamma$ <sup>1</sup> | RH (%)  | SO <sub>2</sub> (ppb) | aerosol yield (%) <sup>[a]</sup> | H <sub>2</sub> SO <sub>4</sub> yield (%) <sup>[a]</sup> | The ratio of SO <sub>2</sub> oxidized in gas phase $\alpha$ <sup>[a]</sup> |
|--------|------------------------------------------|--------------------------------------------------------------------------|---------|-----------------------|----------------------------------|---------------------------------------------------------|----------------------------------------------------------------------------|
| 1%     | 1.8                                      | 1                                                                        | <1%     | 30                    | 7.52±0.95                        | 7.52±0.95                                               | 4.91±0.62                                                                  |
|        |                                          |                                                                          | <1%     | 29                    | 7.95±1.15                        | 7.95±1.15                                               | 5.19±0.75                                                                  |
|        |                                          |                                                                          | <1%     | 40                    | 10.41±1.32                       | 10.41±1.32                                              | 6.80±0.87                                                                  |
|        |                                          |                                                                          | <1%     | 43                    | 12.39±1.45                       | 12.39±1.45                                              | 8.09±0.95                                                                  |
|        |                                          |                                                                          | 1.5     | 43                    | 12.25±1.42                       | 12.25±1.42                                              | 8.00±0.92                                                                  |
|        |                                          |                                                                          | average |                       | 10.10±2.30                       | 10.10±2.30                                              | 6.60±1.50                                                                  |
| 5%     | 1.7                                      | 0.72                                                                     | 6.1     | 43                    | 22.35±2.45                       | 16.40±2.01                                              | 10.71±1.31                                                                 |
|        |                                          |                                                                          | 5.1     | 41                    | 25.32±2.85                       | 18.23±2.05                                              | 11.91±1.34                                                                 |
|        |                                          |                                                                          | 4.7     | 43                    | 25.50±2.91                       | 18.53±2.12                                              | 12.10±1.38                                                                 |
|        |                                          |                                                                          | 5.6     | 43                    | 26.74±2.97                       | 19.38±2.23                                              | 12.66±1.46                                                                 |
|        |                                          |                                                                          | average |                       | 24.98±1.86                       | 18.13±1.26                                              | 11.84±0.82                                                                 |
| 10%    | 1.6                                      | 0.7                                                                      | 10.8    | 16                    | 43.90±5.17                       | 30.73±3.62                                              | 20.07±2.37                                                                 |
|        |                                          |                                                                          | 10.7    | 27                    | 44.17±5.09                       | 30.92±3.56                                              | 20.19±2.33                                                                 |
|        |                                          |                                                                          | 9.3     | 40                    | 47.24±5.31                       | 33.07±3.72                                              | 21.59±2.43                                                                 |

|     |     |      |         |    |            |            |            |
|-----|-----|------|---------|----|------------|------------|------------|
| 20% | 1.5 | 0.6  | 11.5    | 40 | 51.22±6.12 | 35.86±4.28 | 23.42±2.8  |
|     |     |      | average |    | 46.63±3.42 | 32.64±2.39 | 21.32±1.56 |
|     |     |      | 21.2    | 33 | 31.41±3.53 | 18.85±2.12 | 12.31±1.38 |
|     |     |      | 19.3    | 35 | 45.21±5.26 | 27.13±3.15 | 17.72±2.06 |
|     |     |      | 21.0    | 34 | 42.86±5.12 | 25.72±3.07 | 16.79±2.01 |
|     |     |      | 19.2    | 35 | 41.11±4.68 | 24.67±2.81 | 16.11±1.83 |
| 30% | 1.4 | 0.54 | average |    | 40.15±6.06 | 24.09±3.64 | 15.73±2.38 |
|     |     |      | 28.6    | 39 | 28.59±3.16 | 15.44±1.70 | 10.08±1.11 |
|     |     |      | 29.8    | 49 | 33.06±3.69 | 17.85±1.99 | 11.66±1.3  |
|     |     |      | 31.2    | 45 | 29.95±3.28 | 16.17±1.77 | 10.56±1.16 |
|     |     |      | 29.4    | 42 | 27.30±2.94 | 14.74±1.59 | 9.63±1.04  |
|     |     |      | average |    | 29.73±2.47 | 16.05±1.34 | 10.48±0.87 |
| 50% | 1.3 | 0.45 | 53.0    | 41 | 30.84±3.37 | 13.88±1.51 | 9.06±0.99  |
|     |     |      | 53.7    | 39 | 33.11±3.67 | 14.90±1.65 | 9.73±1.08  |
|     |     |      | 43.1    | 48 | 35.74±3.96 | 16.08±1.78 | 10.50±1.16 |
|     |     |      | 59.6    | 48 | 32.54±3.89 | 14.64±1.75 | 9.56±1.14  |
|     |     |      | average |    | 33.06±2.03 | 14.88±0.91 | 9.72±0.60  |
|     |     |      | 76.3    | 62 | 52.90±5.84 | 14.28±1.58 | 9.33±1.03  |
| 70% | 1.2 | 0.27 | 75.9    | 43 | 80.39±9.45 | 21.49±2.99 | 14.04±1.94 |
|     |     |      | 73.8    | 43 | 88.78±9.87 | 23.97±2.66 | 15.65±1.74 |
|     |     |      | 71.5    | 47 | 51.05±5.99 | 13.78±1.62 | 9.00±1.06  |
|     |     |      | average |    | 68.28±19.1 | 18.38±5.13 | 12.00±3.35 |
|     |     |      |         | 5  |            |            |            |
|     |     |      |         |    |            |            |            |

<sup>[a]</sup>: the stated uncertainties included 10% system error and the standard error of fitting.

**Scheme S1.** The reaction between HPF and OH radical.

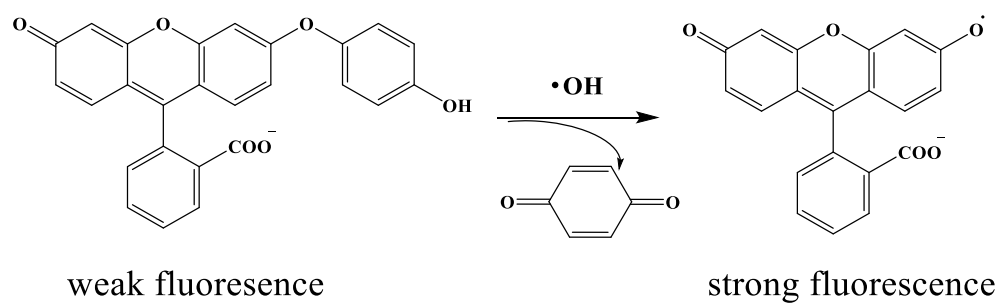

**Scheme S2.** the reaction between ABTS and H<sub>2</sub>O<sub>2</sub> in the presence of POD.

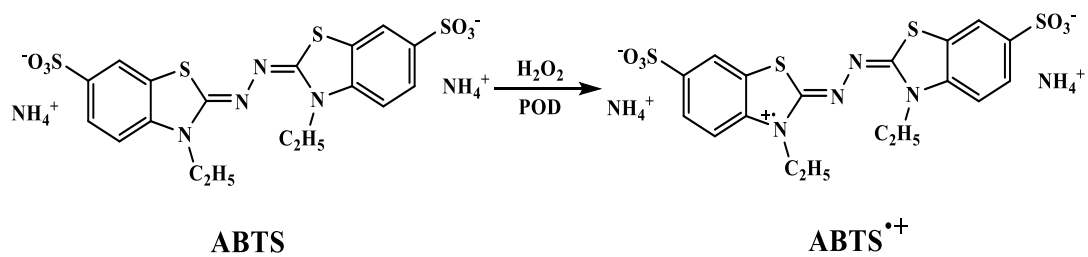



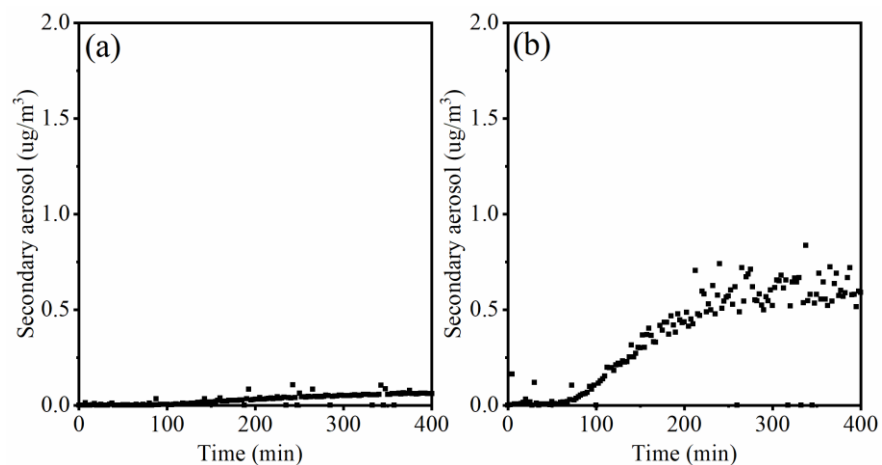

**Figure S1.** Secondary aerosol formation in the photolysis of  $\text{SO}_2$  at RH 1% (a) and 30% (b).

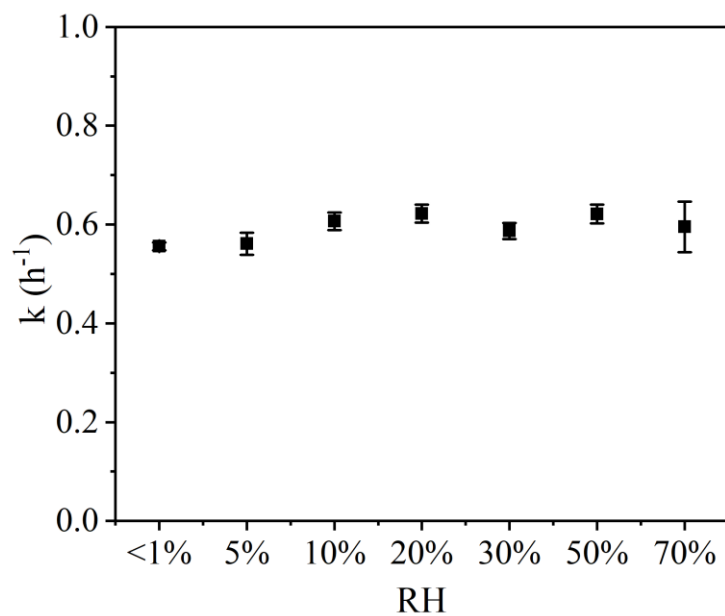

**Figure S2.** Reaction rate of the photocatalysis of  $\text{SO}_2$  by  $\text{TiO}_2$  at various RH condition.

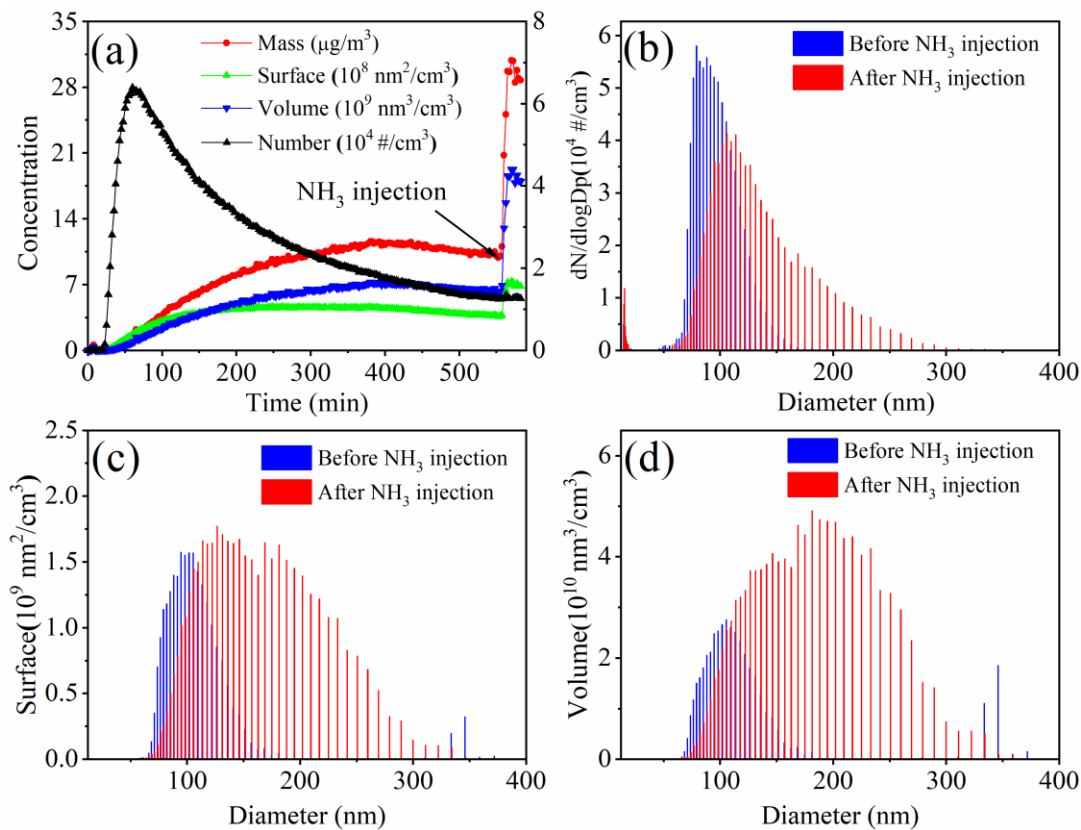

**Figure S3.** Evolution of  $\text{SA}_g$  including total mass, total surface, total volume, and total number concentration (a), the comparison of the distribution of number concentration (b), surface concentration (c), and volume concentration (d) before  $\text{NH}_3$  injection and after  $\text{NH}_3$  injection.

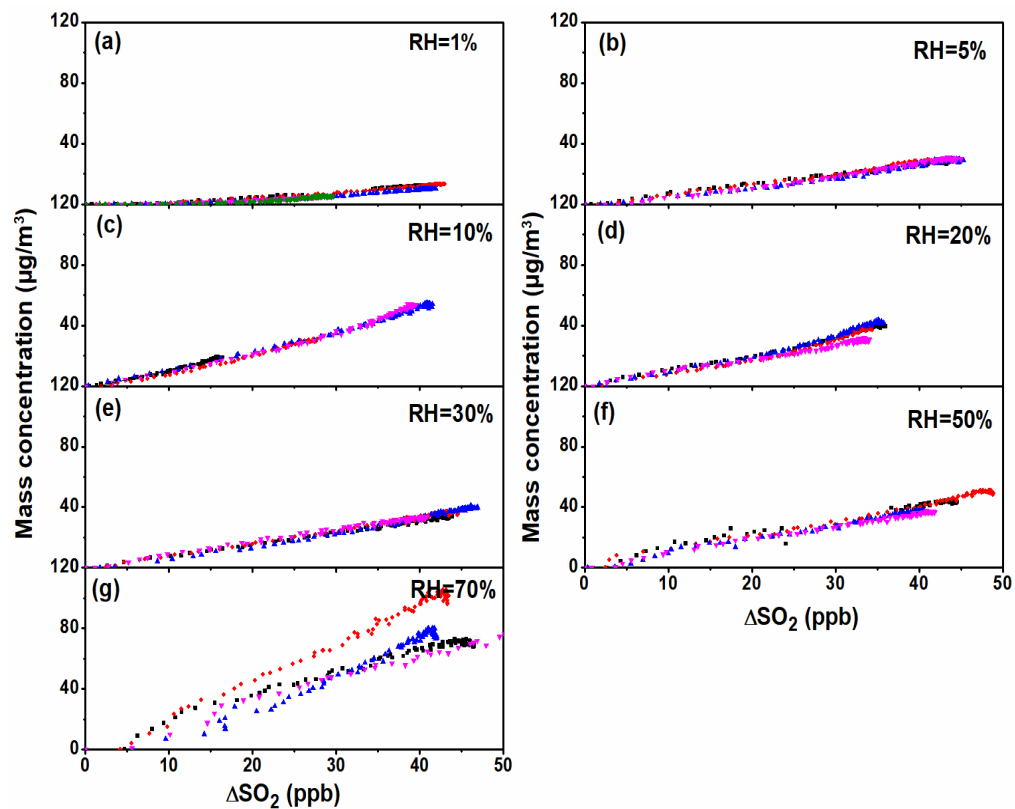

**Figure S4.** Formation of  $SA_g$  in the photocatalysis of  $SO_2$  by  $TiO_2$  at different RH, (a)、(b)、(c)、(d)、(e)、(f)、(g) represent the results at RH 1%、5%、10%、20%、30%、50% and 70%, respectively. The different colours represent the repeated experiments.

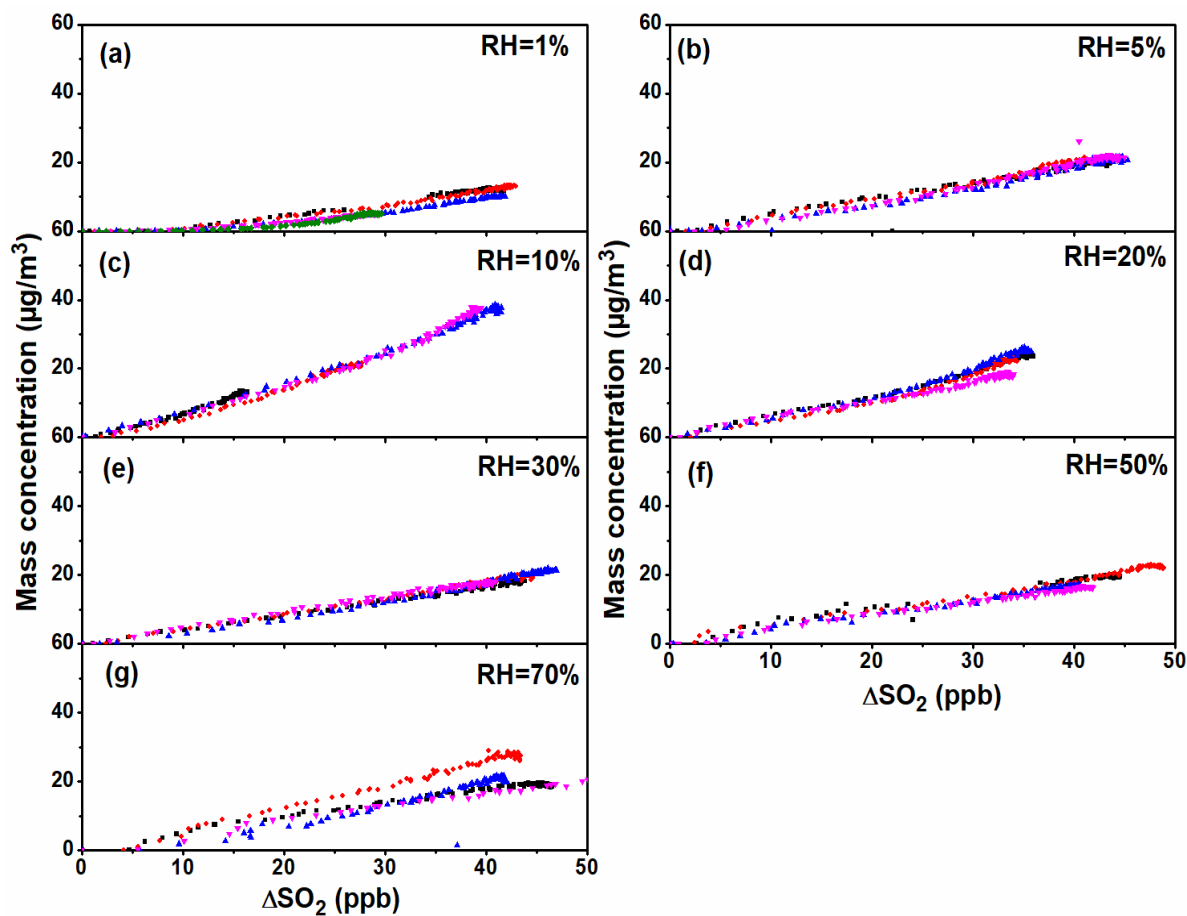

**Figure S5.** Formation of  $\text{SA}_g\text{-H}_2\text{SO}_4$  in the photocatalysis of  $\text{SO}_2$  by  $\text{TiO}_2$  at different RH, (a)、(b)、(c)、(d)、(e)、(f)、(g) represent the results at RH 1%、5%、10%、20%、30%、50% and 70%, respectively. The different colours represent the repeated experiments.

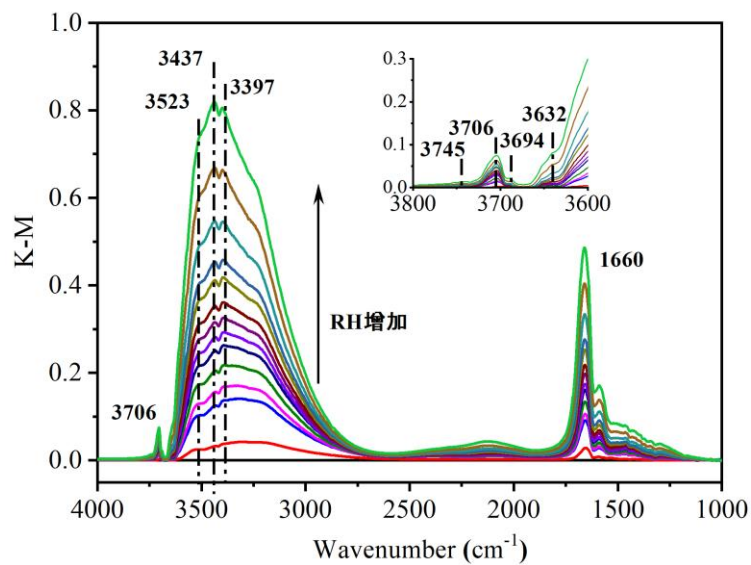

**Figure S6.** The adsorption of H<sub>2</sub>O on TiO<sub>2</sub> under dark condition

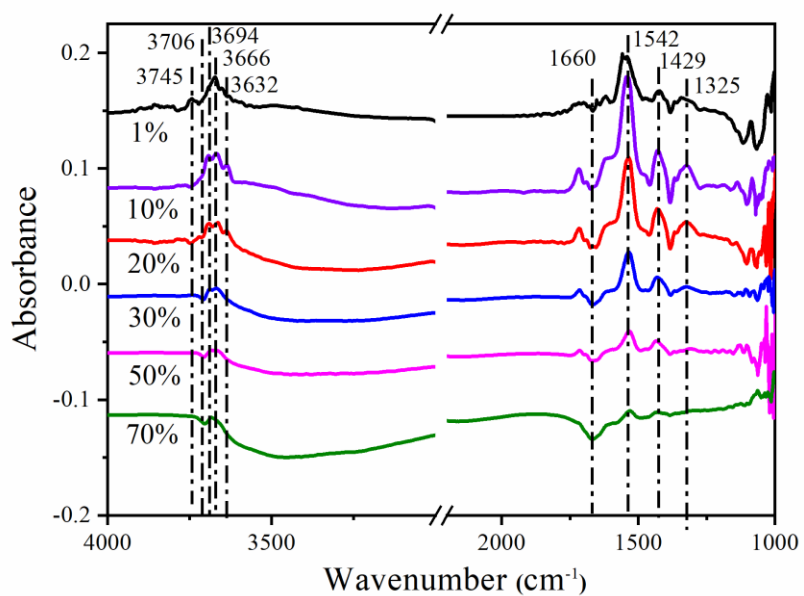

**Figure S7.** DRIFTS spectra of the photocatalysis of H<sub>2</sub>O by TiO<sub>2</sub> under different RH condition.

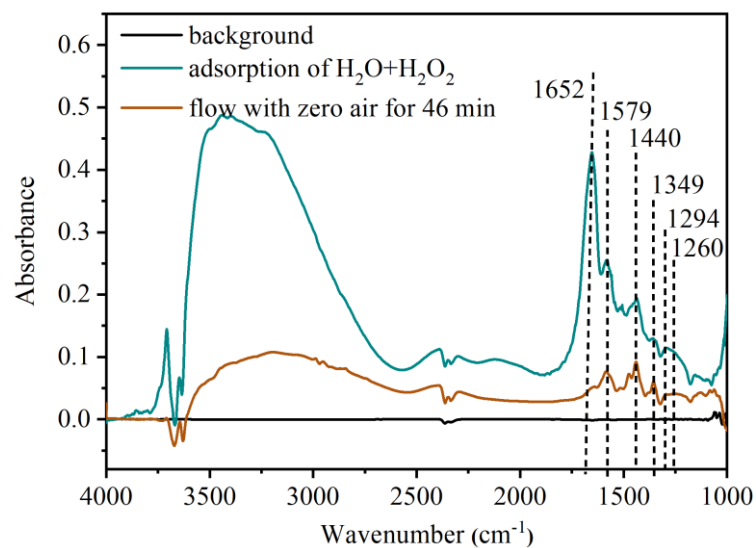

**Figure S8.** DRIFTS spectra of the adsorbed  $\text{H}_2\text{O}_2$  (30% in  $\text{H}_2\text{O}$ ) on  $\text{TiO}_2$ .

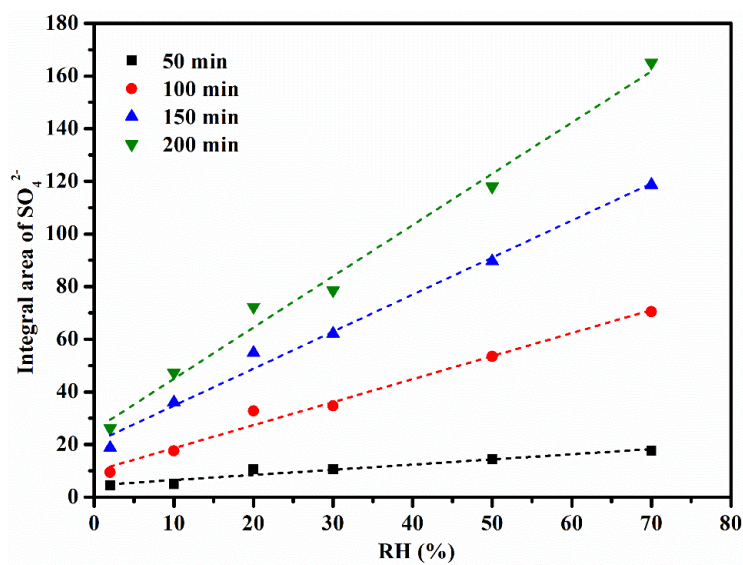

**Figure S9.** Evolution of the integral areas of  $\text{SO}_4^{2-}$  on  $\text{TiO}_2$  at various RH conditions.

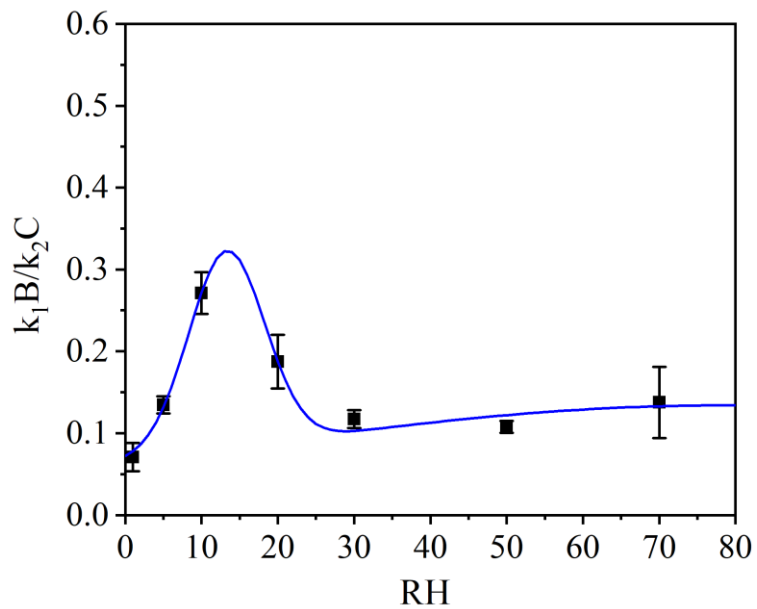

**Figure S10.** Gaussian fitting of the proportion of SO<sub>2</sub> oxidized in gas phase with the increase of RH.

#### References

(1) Seinfeld, J. H.; Pandis, S. N., Atmospheric Chemistry and Physics: From Air Pollution to Climate Change; John Wiley & Sons, 2016.
